# Supplementary material
Source: Springer Nature journal article supplement (https://www.springermedizin.de/resource/supplementary/12889_2011_4110_MOESM2_ESM.pdf/9491418)

# ROC Curve

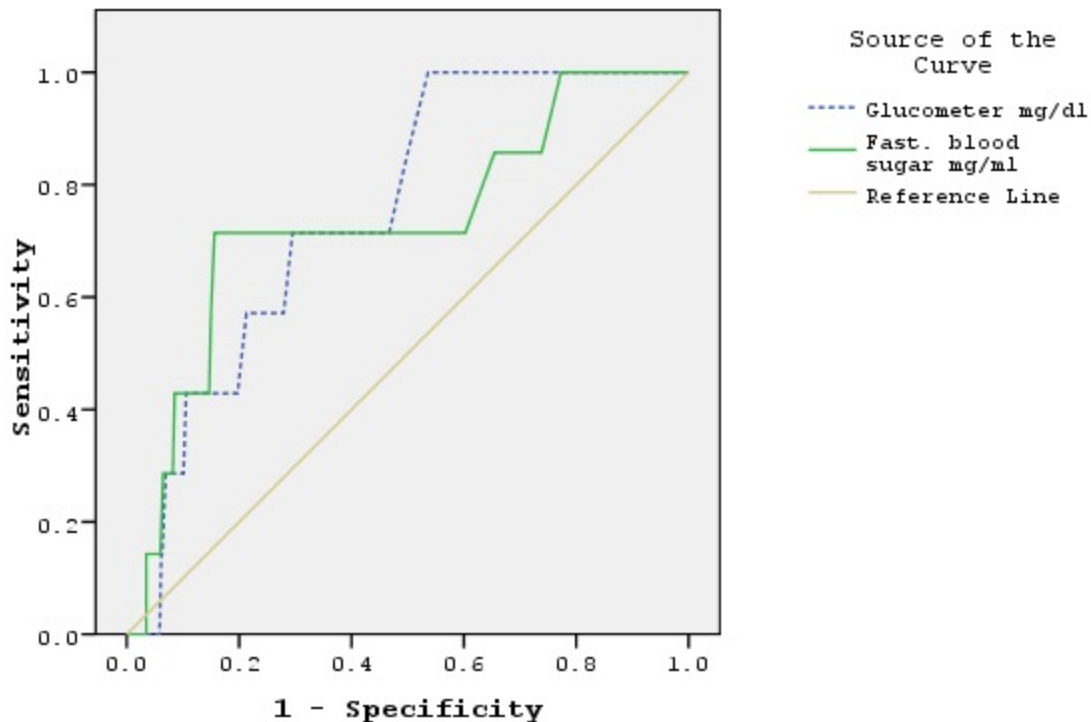

Diagonal segments are produced by ties.

Supplement: MOESM2 [file 9491418]
